# Supplementary material for: Enhanced Microvasculature Formation and Patterning in iPSC–Derived Kidney Organoids Cultured in Physiological Hypoxia
Source: PubMed Central journal article supplement (PMC9240933; doi:10.3389/fbioe.2022.860138), 2022-06-13
Supplement: DataSheet1.pdf [file DataSheet1.pdf]

## Supplementary Material

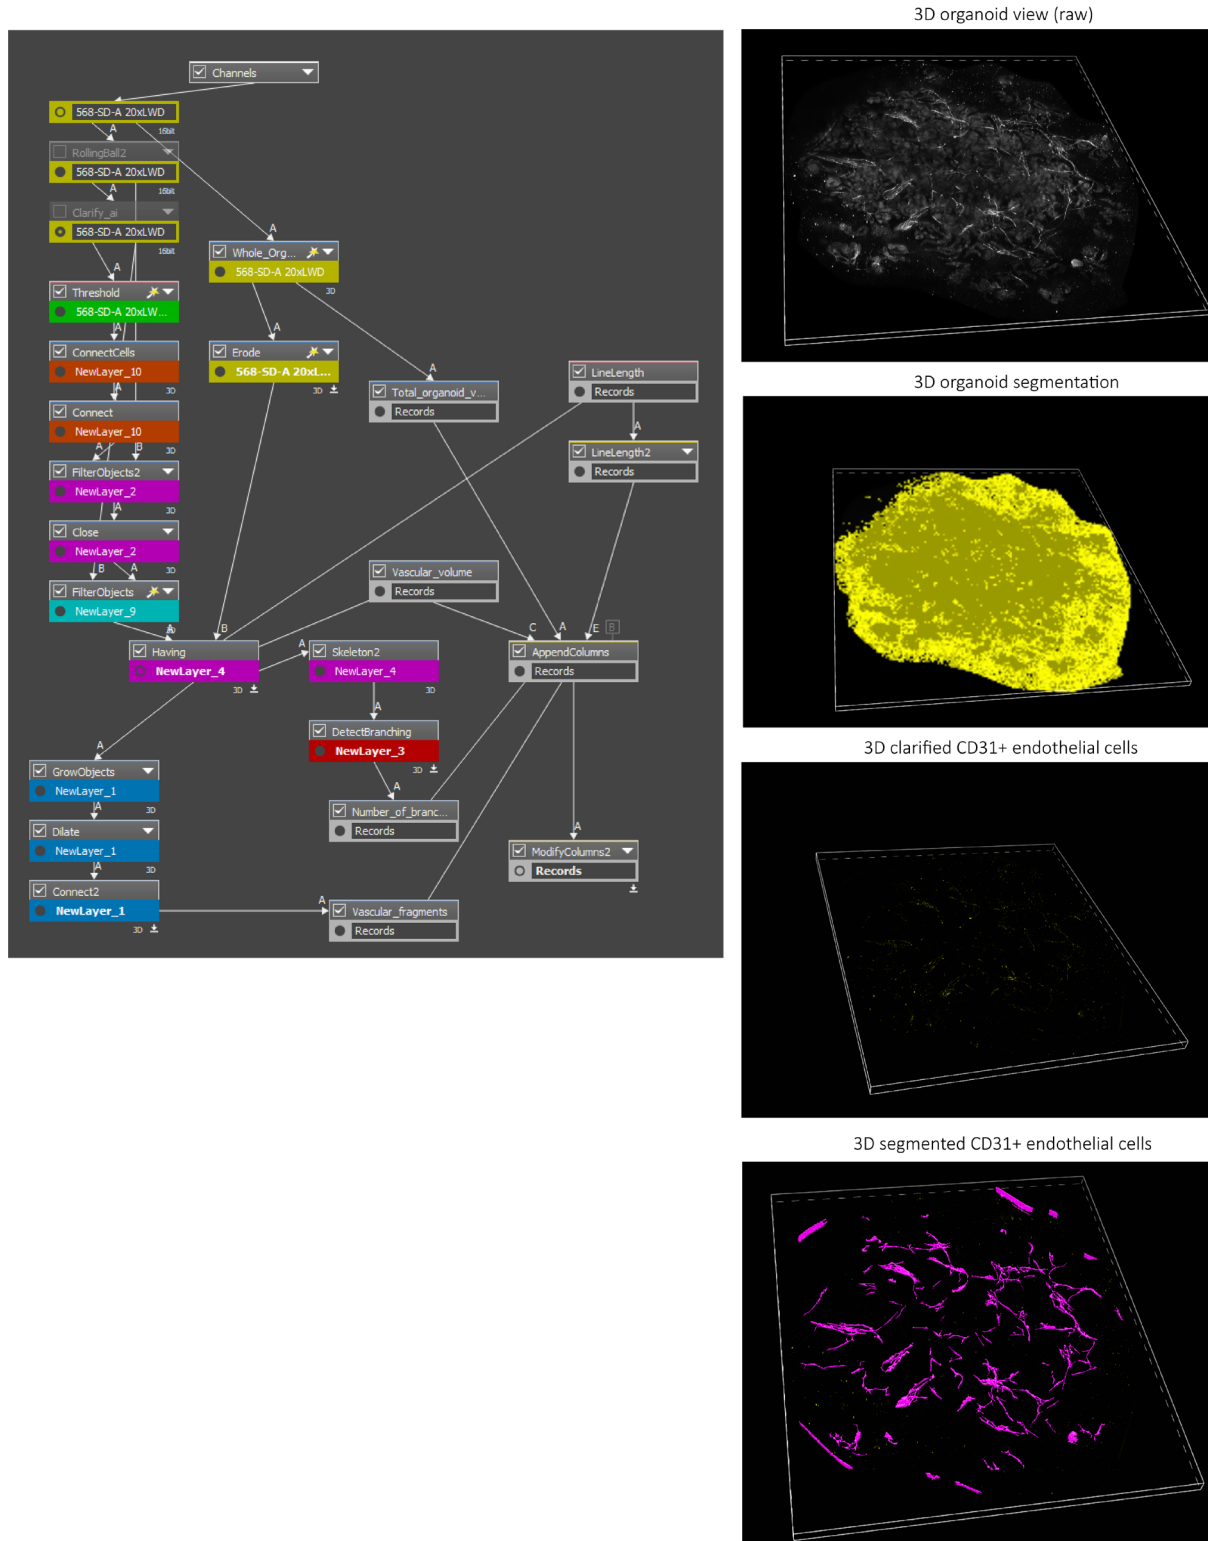

Supplementary figure 1: Segmentation and quantification pipeline of the endothelial network in 3D. Detailed description can be found in the methods section. Briefly, after clarifying the image, the CD31 signal was thresholded, and after conservative filtering, the vessels were skeletonized and segmented.

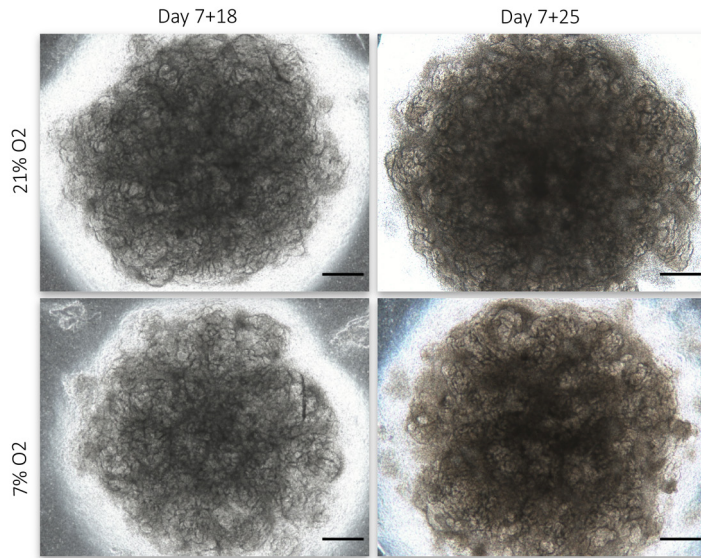

Supplementary figure 2: Brightfield images of organoids in normoxia and hypoxia. Kidney organoids in 21% O<sub>2</sub> and 7% O<sub>2</sub> develop similar morphologies. Scale bars: 1 mm

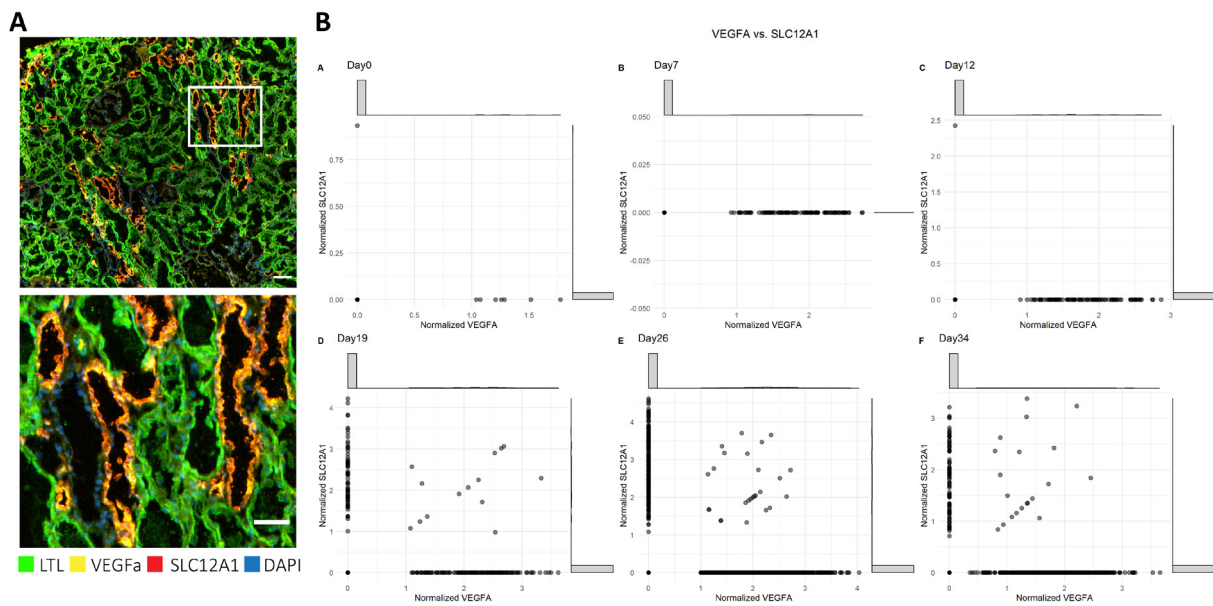

Supplementary figure 3: Vascular endothelial growth factor alpha (VEGF-A) marker validation on adult human kidney and in single cell RNA sequencing datasets of kidney organoids. VEGF-A is co-expressed with Solute carrier family 12 member 1 (SLC12A1) in both adult human kidney sections (A) and single cell RNA sequencing data (B) of Wu et al (2018). Scale bars: 50  $\mu$ m

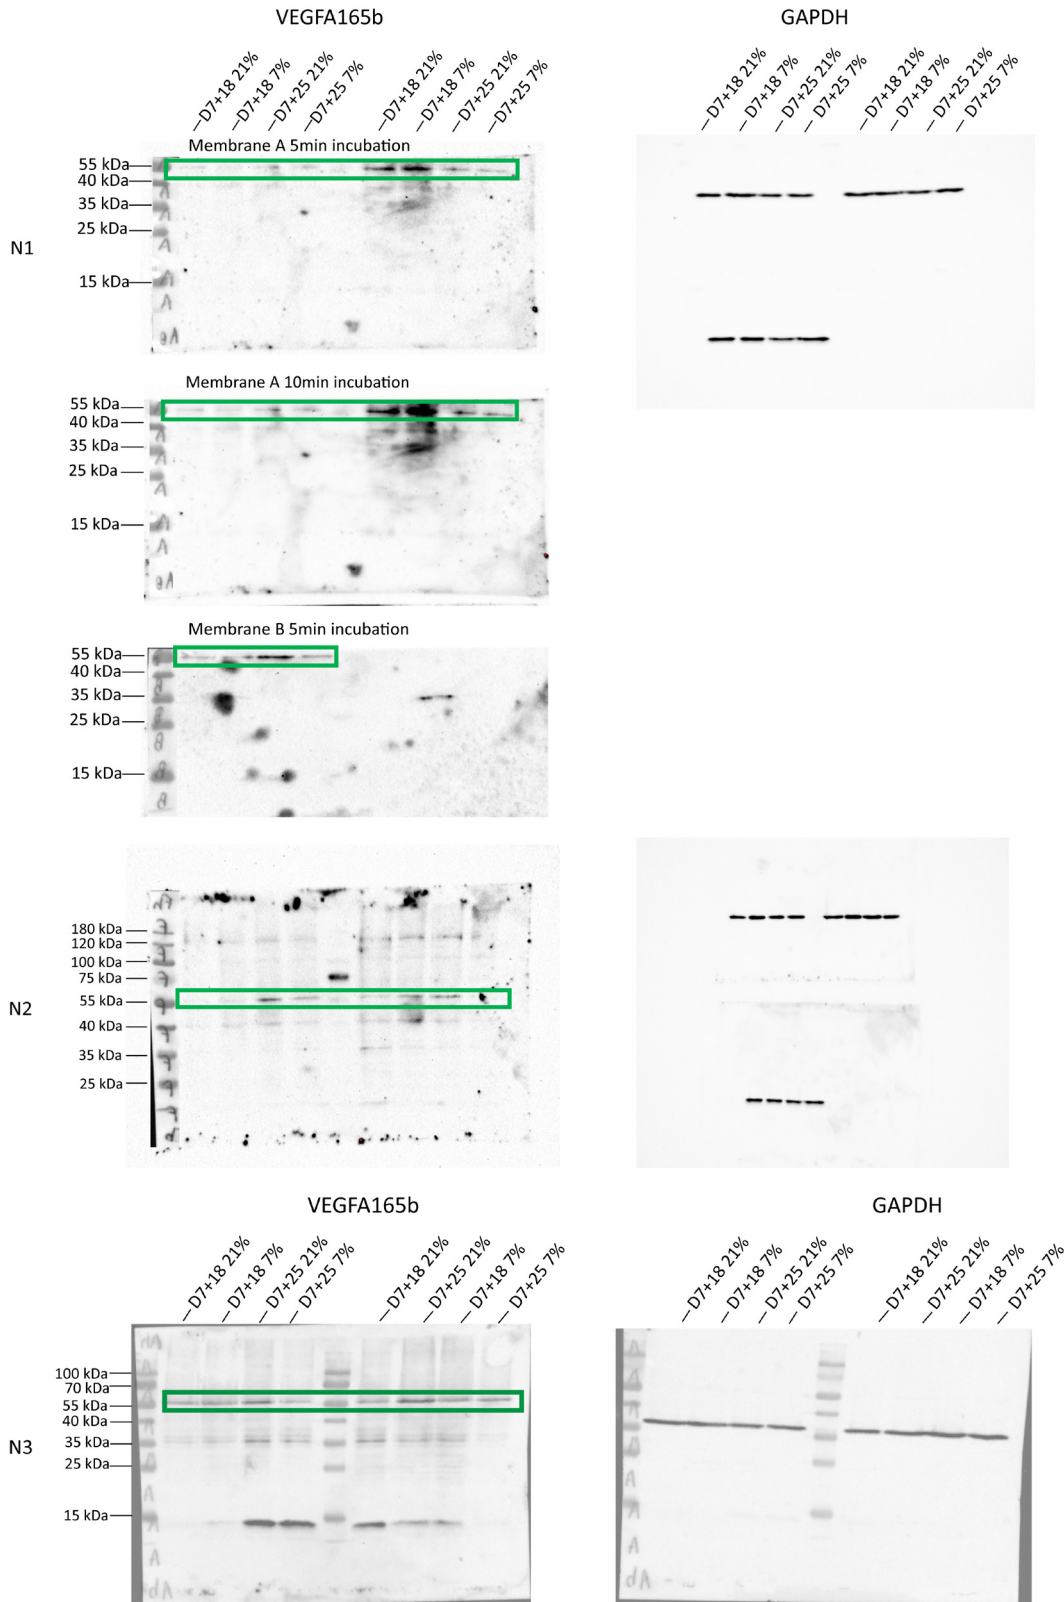

Supplementary figure 4: Raw blots of VEGF-A165b and GAPDH, indicating the downregulation of VEGF-165b in hypoxia compared to normoxia at D7+25.

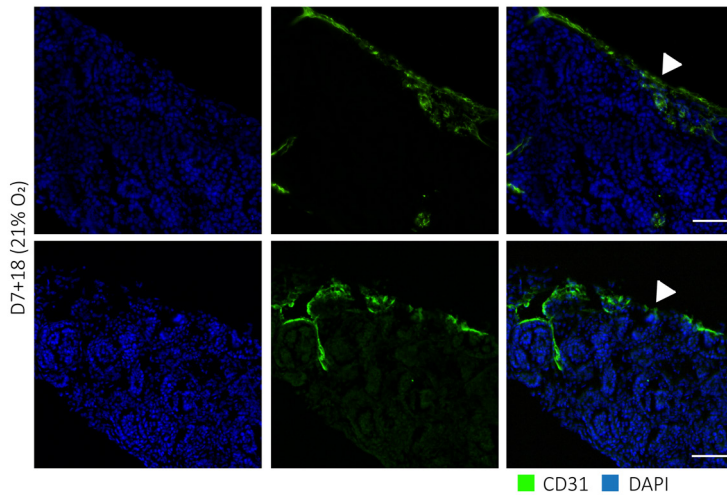

Supplementary figure 5: Localization of endothelial cells in kidney organoids. Immunofluorescence staining of D7+18 (21% O<sub>2</sub>) shows that endothelial cells are largely located on the surface of the organoids (arrow indicating the air-exposed surface) and only rarely infiltrate into the organoids or reside on the bottom and leaving them directly exposed to the hyperoxic incubator air. Scale bars: 50  $\mu$ m (top row), 70  $\mu$ m (bottom row).

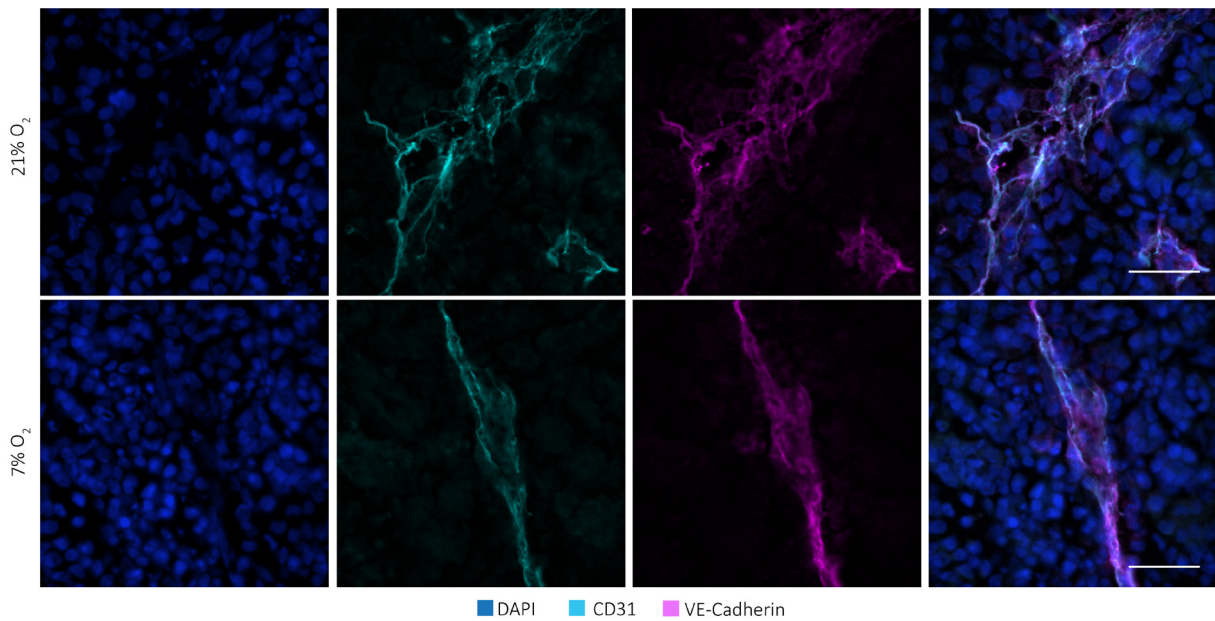

Supplementary figure 6: CD31 and VE-cadherin expression at day 7+25 at 21% and 7% O<sub>2</sub>. Co-expression of CD31 and VE-cadherin indicates maintenance of the endothelial phenotype at day 7+25 in culture in both 21% and 7% O<sub>2</sub>. Scale bar: 30  $\mu$ m

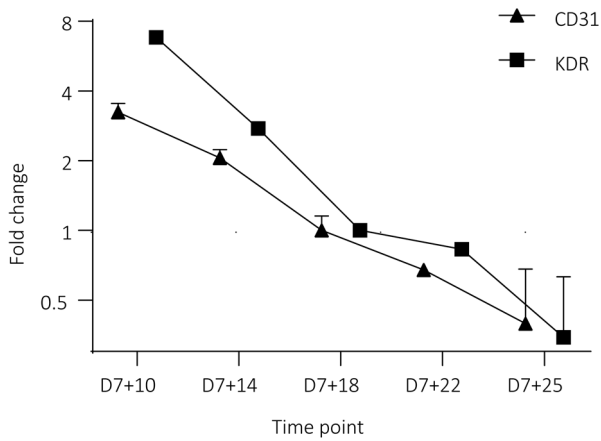

Supplementary figure 7: Gene expression of CD31 and KDR is downregulated over time in 21% O<sub>2</sub> indicating a diminishing endothelial network.

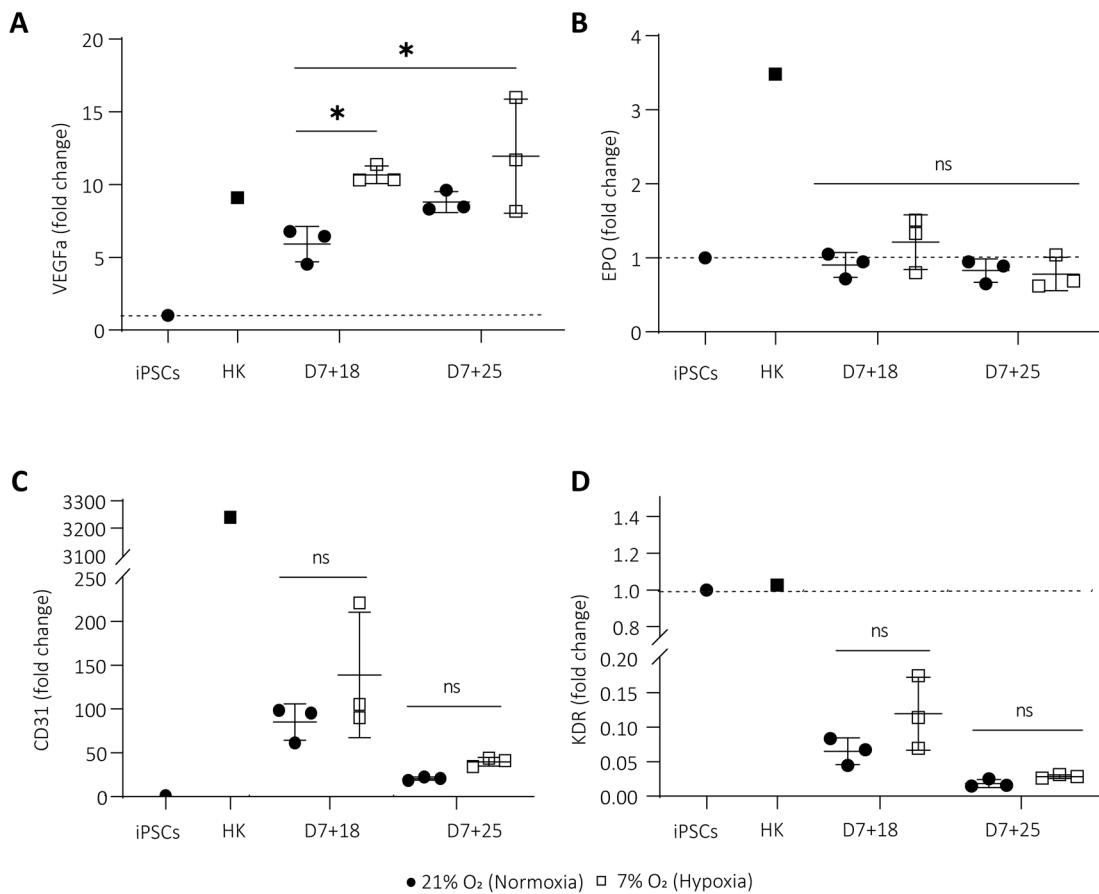

Supplementary figure 8: Gene expression of VEGF-A (all variants), EPO, CD31 and KDR in 21% O<sub>2</sub> and 7% O<sub>2</sub> of a single experiment. VEGF-A mRNA is significantly upregulated at 7% O<sub>2</sub> (A). There is no significant difference between 21% O<sub>2</sub> and 7% O<sub>2</sub> in EPO (B), CD31 (C) and KDR (D) gene expression. Human kidney and iPSCs were plotted as reference. (n=3, N=1)

## Supplementary Tables

Supplementary Table 1: List of antibodies and stains used for immunofluorescence of cryosections and whole organoids.

| Target                                          | Host   | Dilution | Supplier                 | Cat. no.  |
|-------------------------------------------------|--------|----------|--------------------------|-----------|
| <b>Primary antibodies and stains</b>            |        |          |                          |           |
| CD31                                            | Sheep  | 1:300    | R&D Systems              | AF809     |
| E-cadherin (ECAD)                               | Mouse  | 1:300    | BD Bioscience            | 610182    |
| HIF1 $\alpha$                                   | Mouse  | 1:300    | Abcam                    | ab16066   |
| HIF2 $\alpha$                                   | Mouse  | 1:250    | Santa Cruz Biotechnology | sc-46691  |
| Lotus tetragonolobus lectin (LTL), Biotinylated | N/A    | 1:300    | Vector Laboratories      | B-1325-2  |
| MEIS 1/2/3                                      | Mouse  | 1:300    | Santa Cruz Biotechnology | SC-101850 |
| Nephrin (NPHS1)                                 | Sheep  | 1:300    | R&D Systems              | AF4269    |
| SLC21A1                                         | Rabbit | 1:200    | Sigma-Aldrich            | HPAG14967 |
| VEGF-A                                          | Mouse  | 1:250    | Santa Cruz Biotechnology | SC-7269   |
| VEGF-A165b                                      | Mouse  | 1:500    | R&D Systems              | MAB3045   |
| WT1                                             | Rabbit | 1:500    | Abcam                    | ab89901   |
| <b>Secondary antibodies and stains</b>          |        |          |                          |           |
| Anti-Mouse 488                                  | Goat   | 1:400    | Thermo Fisher Scientific | 10696113  |
| Anti-Mouse 568                                  | Goat   | 1:400    | Thermo Fisher Scientific | A-11031   |
| Anti-Mouse 647                                  | Goat   | 1:400    | Thermo Fisher Scientific | A-21236   |
| Anti-Rabbit 568                                 | Donkey | 1:400    | Thermo Fisher Scientific | 10617183  |
| Anti-Sheep 488                                  | Donkey | 1:400    | Thermo Fisher Scientific | 10473982  |
| Anti-Sheep 568                                  | Donkey | 1:400    | Thermo Fisher Scientific | A-21099   |
| Goat Anti-Mouse IgG (H + L)-HRP Conjugate       | Mouse  | 1:3000   | Bio-Rad                  | 1706516   |
| Streptavidin 647                                | N/A    | 1:400    | Thermo Fisher Scientific | S21374    |

Supplementary Table 2: List of qPCR primers.

| NCBI gene ID | Gene symbol        | Forward primer (5' to 3') | Reverse primer (5' to 3') |
|--------------|--------------------|---------------------------|---------------------------|
| 283          | ANG                | CAAGGCCATCTGTGAAAACAAG    | CAGGGGGAACCTCCATGTAG      |
| 2056         | EPO                | GACATAGTGGCCATGGATGAAG    | CGAGGCCAAAGCAGATGAG       |
| 2597         | GADPH <sup>a</sup> | CTGGGCTACACTGAGCACC       | AAGTGGTCGTTGAGGGCAATG     |
| 3791         | KDR                | GGCCCAATAATCAGAGTGGCA     | CCAGTGTCATTTCCGATCACTTT   |
| 5175         | PECAM1             | AACAGTGTTGACATGAAGAGCC    | TGTAAAACAGCACGTCATCCTT    |
| 5692         | PSMB4 <sup>b</sup> | TGGCTCGTTTCCGCAACAT       | GAAATCAGCGTAGTCGCCAG      |
| 7422         | VEGF-A             | AGGGCAGAATCATCACGAAGT     | AGGGTCTCGATTGGATGGCA      |
| 7422         | VEGF-A 121         | AGGCCAGCACATAGGAGAGA      | GCCTCGGCTTGTCACATTTTT     |
| 7422         | VEGF-A 165         | GAGCAAGACAAGAAAATCCC      | CCTCGGCTTGTCACATCTG       |
| 7422         | VEGF-A 189         | TAAGTCCTGGAGCGTTCCT       | ACGCGAGTCTGTGTTTTTGC      |

<sup>a</sup> second housekeeping gene used to validate the results

<sup>b</sup> housekeeping gene used for analysis
